# Supplementary material
Source: PubMed Central journal article supplement (PMC3116727)

40 —

30 —

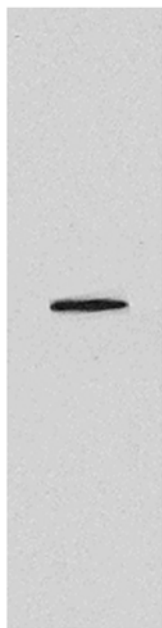

Supplement: NIHMS285450-supplement-01.pdf [file NIHMS285450-supplement-01.pdf]

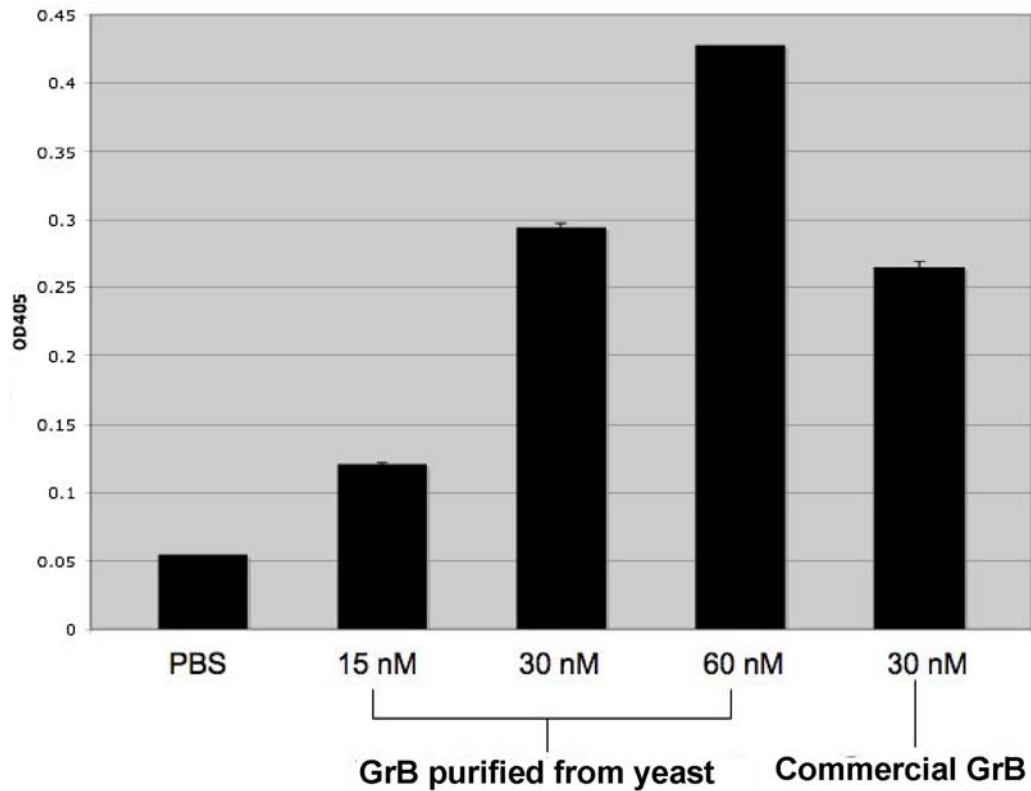

Supplement: NIHMS285450-supplement-02.pdf [file NIHMS285450-supplement-02.pdf]

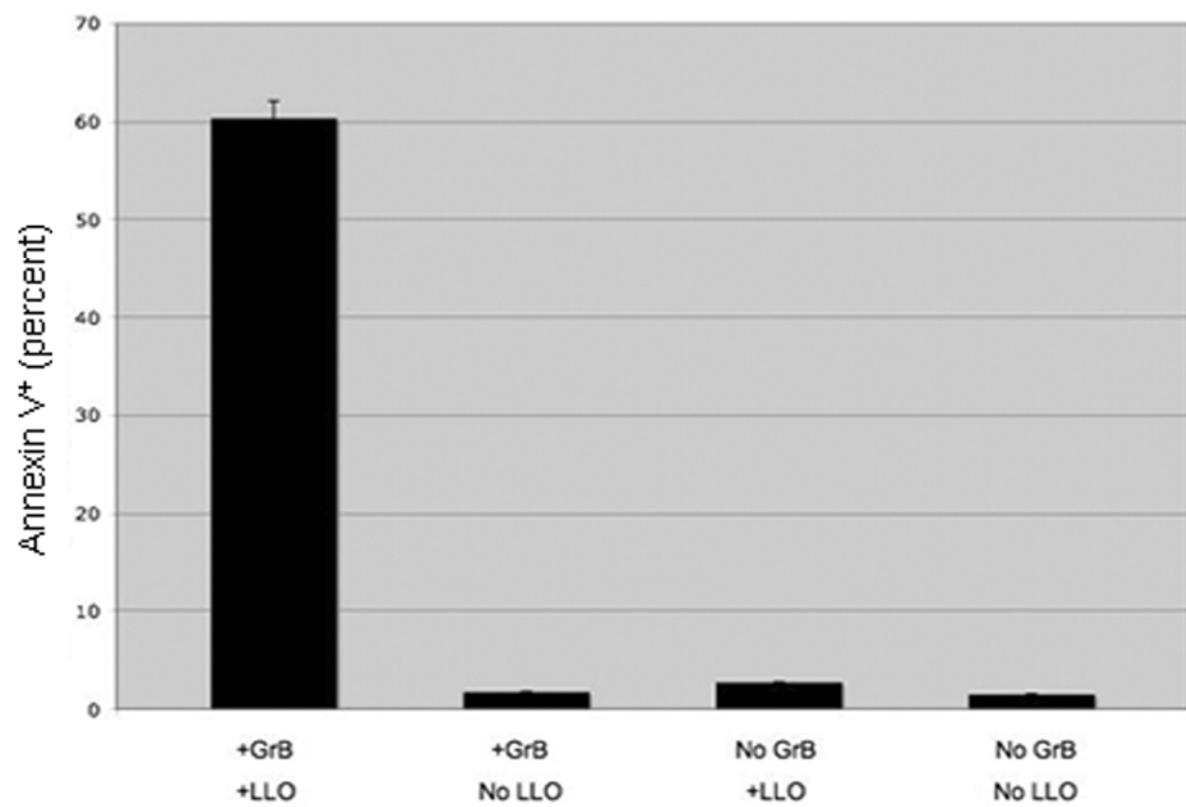

Supplement: NIHMS285450-supplement-03.pdf [file NIHMS285450-supplement-03.pdf]

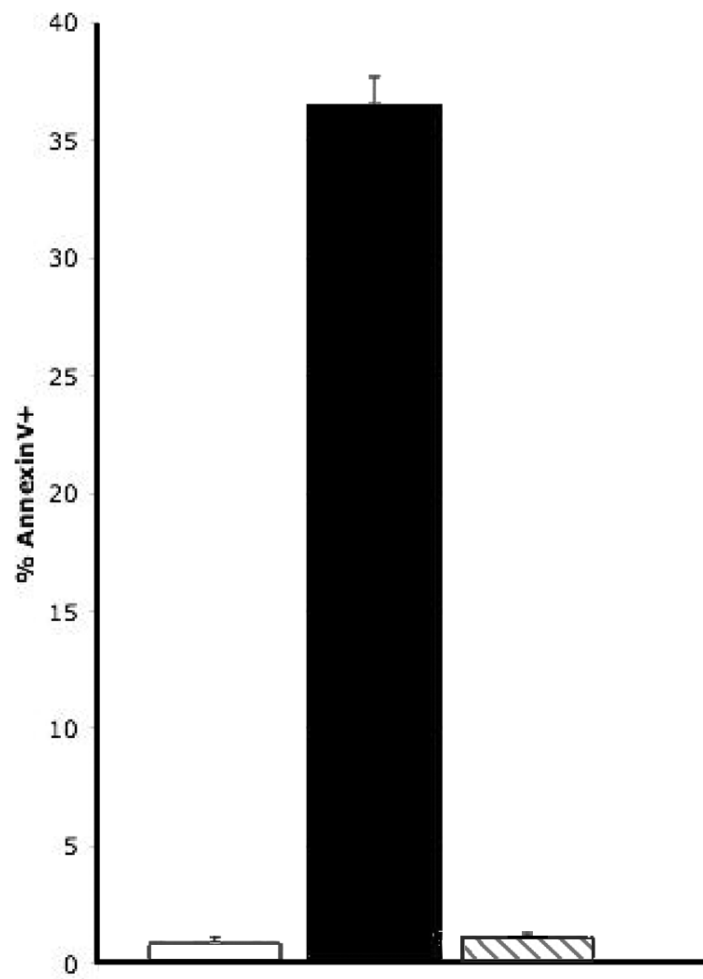

Supplement: NIHMS285450-supplement-04.pdf [file NIHMS285450-supplement-04.pdf]

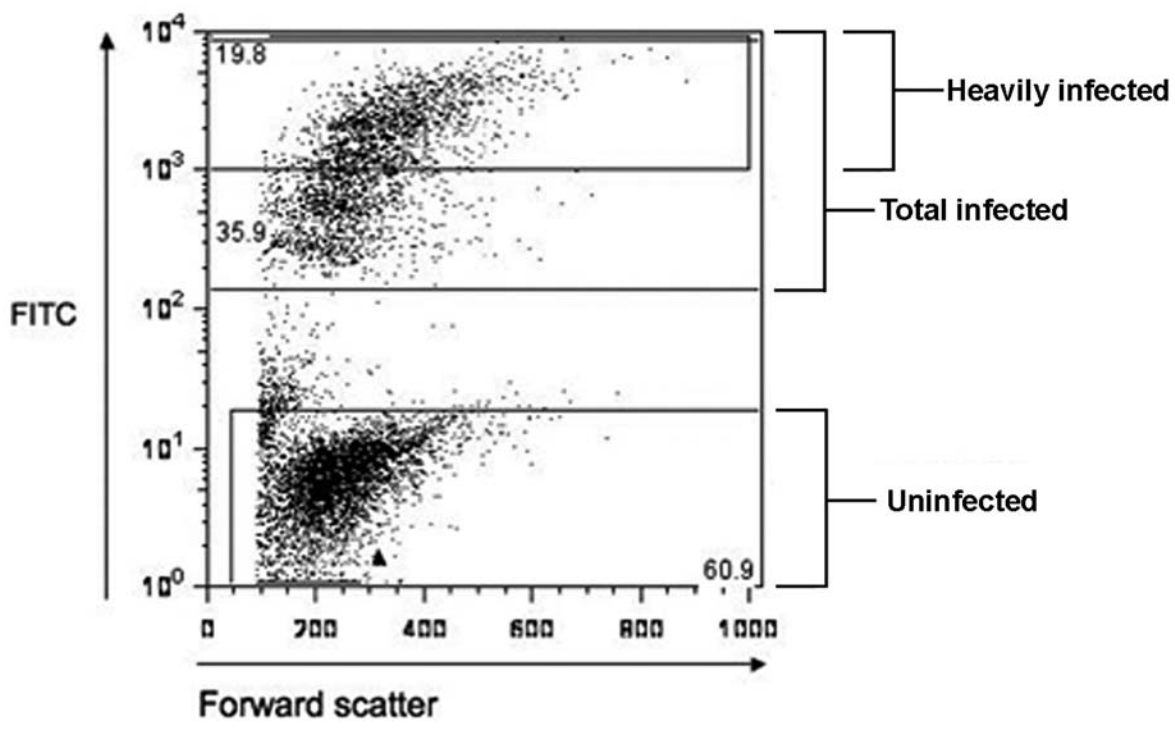

Supplement: NIHMS285450-supplement-05.pdf [file NIHMS285450-supplement-05.pdf]

|                  |   |   |   |   |   |   |
|------------------|---|---|---|---|---|---|
| GrB              | - | + | + | - | + | + |
| zVAD             | - | - | + | - | - | + |
| <i>T. gondii</i> | - | - | - | + | + | + |

STS

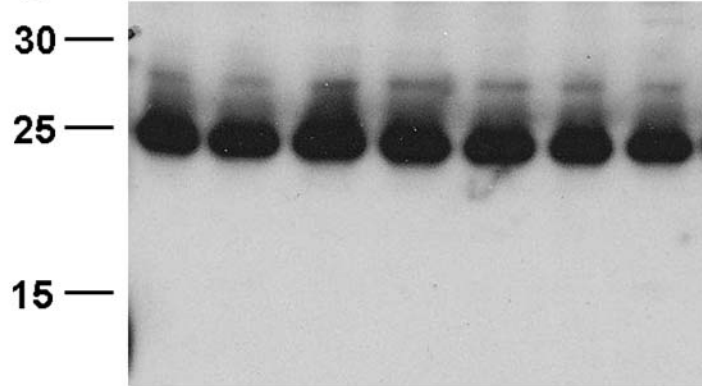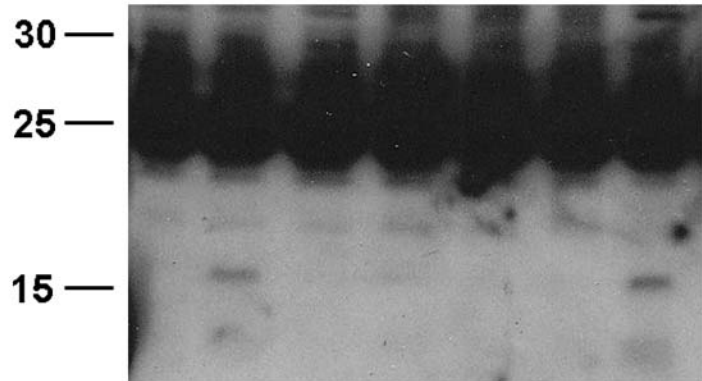

Supplement: NIHMS285450-supplement-08.pdf [file NIHMS285450-supplement-08.pdf]

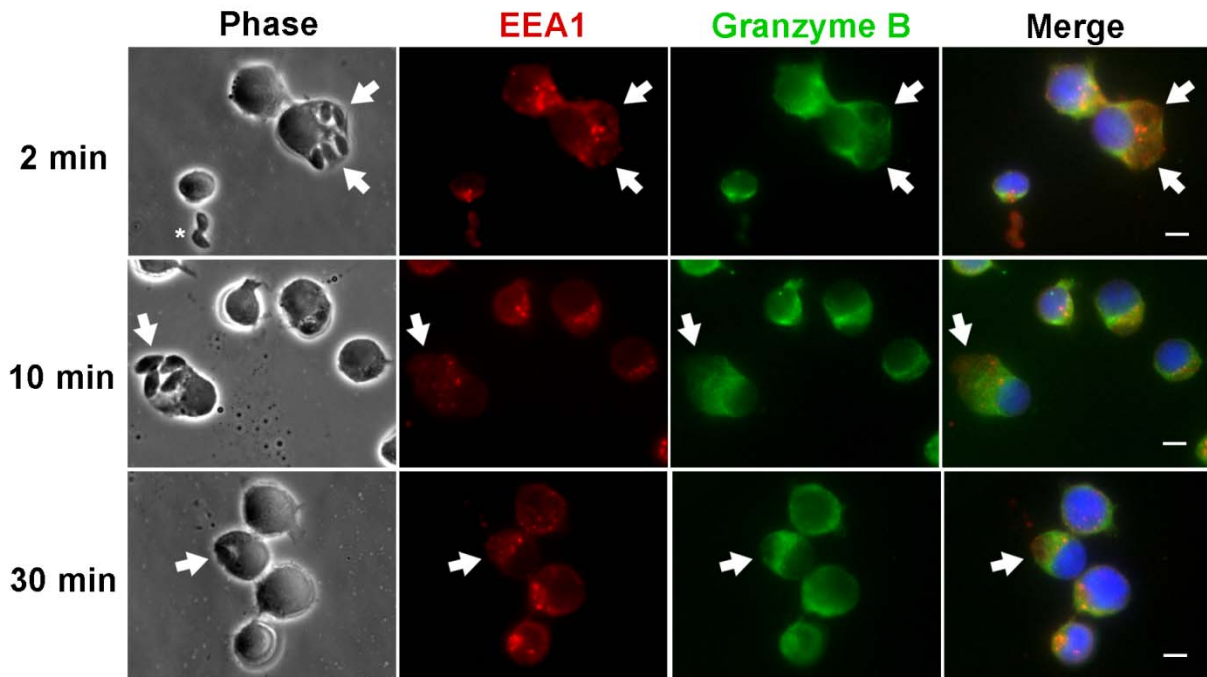

Supplement: NIHMS285450-supplement-09.pdf [file NIHMS285450-supplement-09.pdf]

**A****Phase****Transferrin**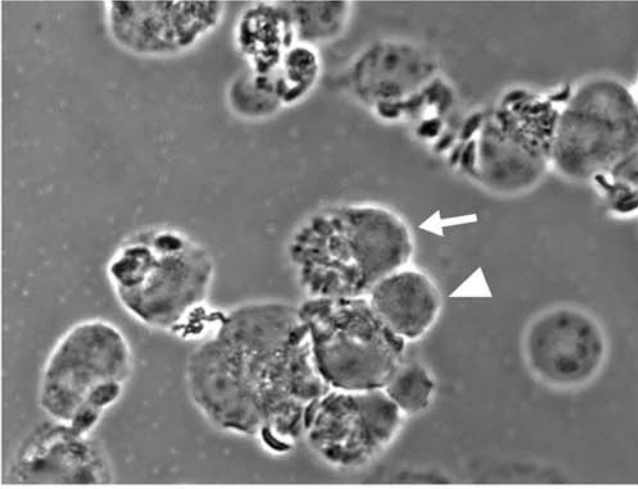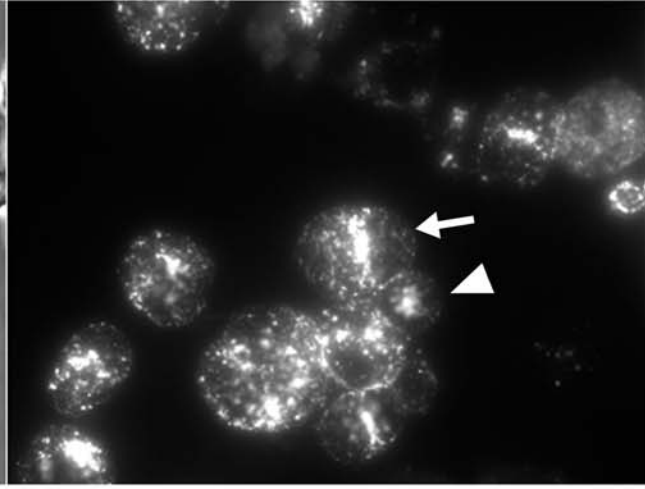**37° C.**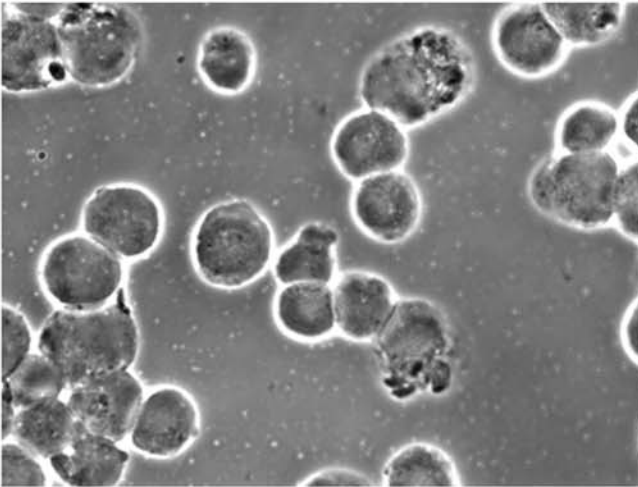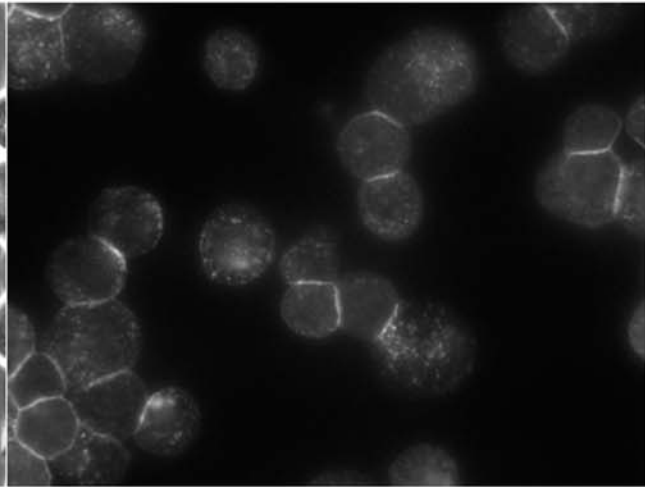**4° C.****B**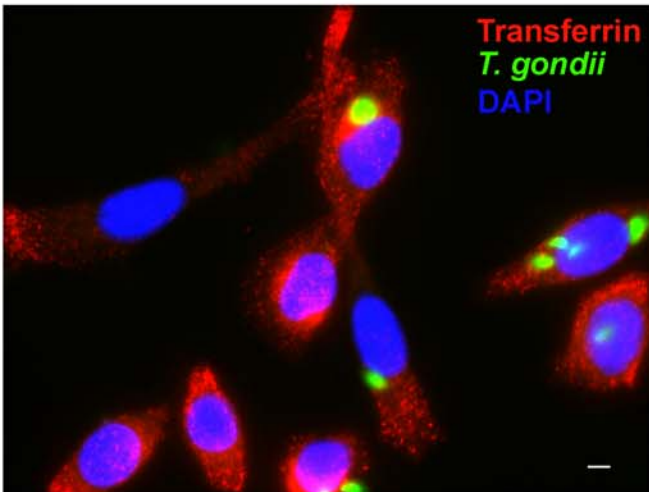**C**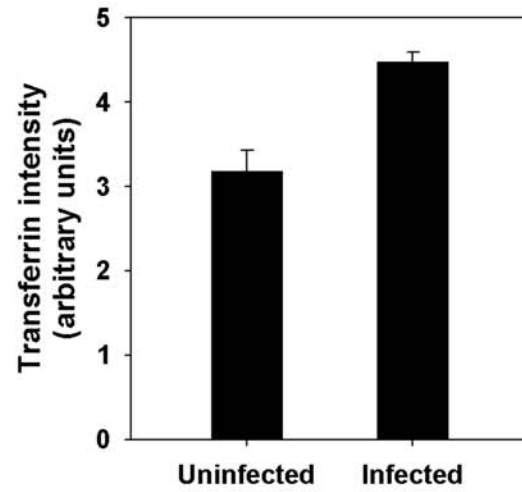

Supplement: NIHMS285450-supplement-10.pdf [file NIHMS285450-supplement-10.pdf]

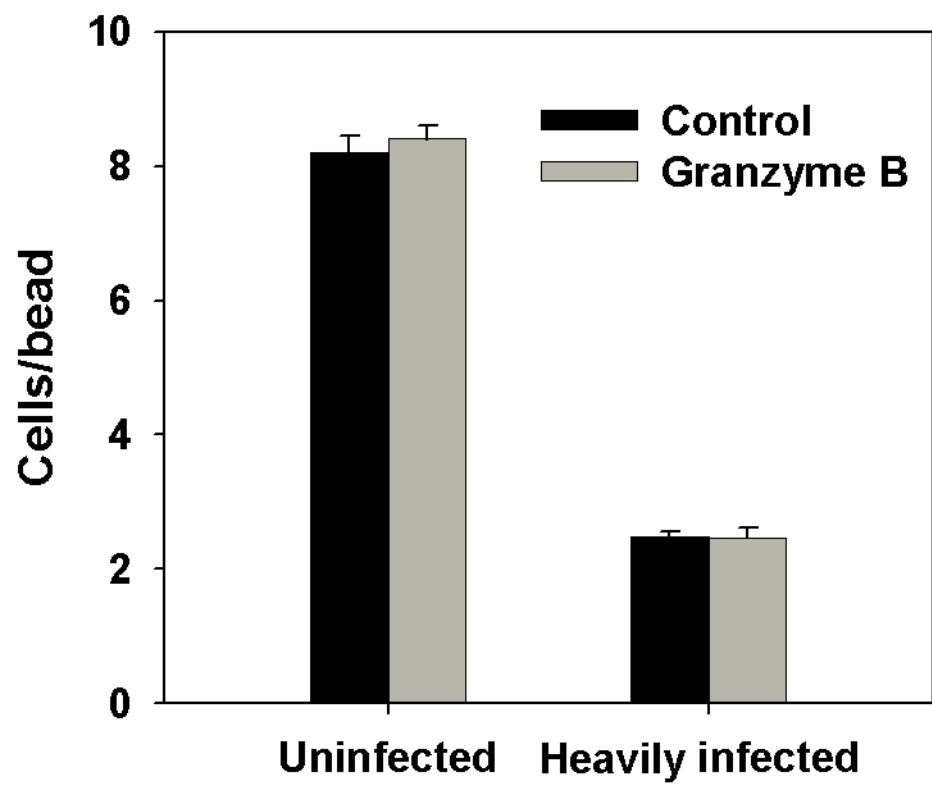

Supplement: NIHMS285450-supplement-11.pdf [file NIHMS285450-supplement-11.pdf]
